# Supplementary material for: The dynamic inflammatory profile of pregnancy can be monitored using a novel lipid-based mass spectrometry technique
Source: Royal Society of Chemistry journal article supplement (doi:10.1039/d2mo00294a), 2023-03-08
Supplement: d2mo00294a1.pdf [file d2mo00294a1.pdf]

**Supplemental figure 1:** A graphical representation of the PC/LPC measurements in this study, in comparison to known progesterone and estrogen flux. Made using BioRender ©
