# Supplementary material for: The dynamic inflammatory profile of pregnancy can be monitored using a novel lipid-based mass spectrometry technique
Source: Royal Society of Chemistry journal article supplement (doi:10.1039/d2mo00294a), 2023-03-08

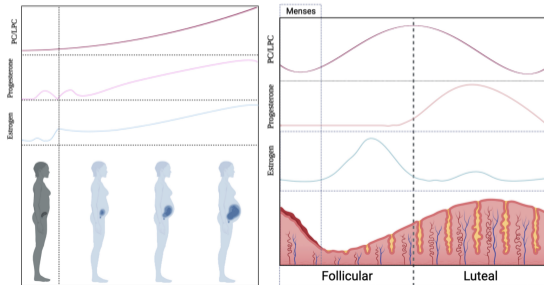

Supplement: d2mo00294a2.pdf [file d2mo00294a2.pdf]
